# Supplementary material for: Three bisphosphonate ligands improve the water solubility of quantum dots
Source: Royal Society of Chemistry journal article supplement (doi:10.1039/c4fd00151f), 2014-01-01
Supplement: c4fd00151f1.pdf [file c4fd00151f1.pdf]

# Supporting Information

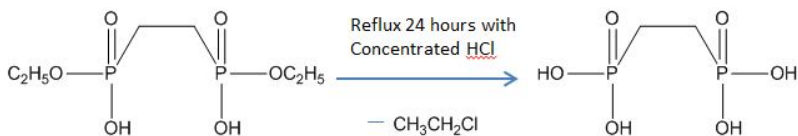

Supplementary Figure 1: Schematic of the reaction of ethylene diphosphonate (EDP); Tetraethyl ethylene-1,2-diphosphonate (TEDP) was reacted at reflux temperatures with 5 concentrated hydrochloric acid (HCl) and left to stir overnight. The reaction produced a white crystalline product with high yield and purity.

## Mass Spectrometry Analysis of sample ligand BIPs - EDP

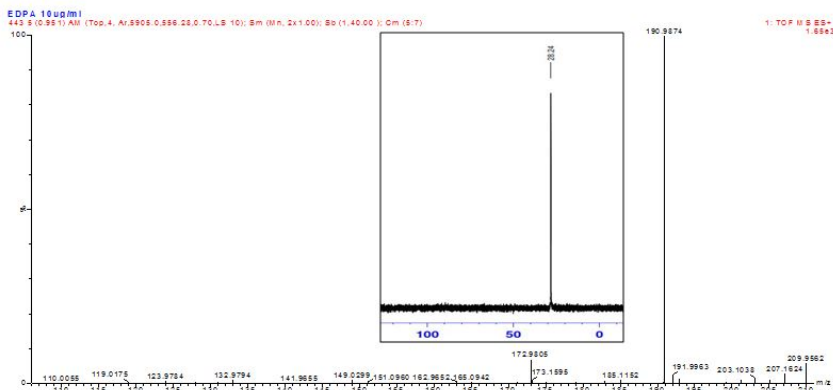

### 10 Elemental Composition Report

Single Mass Analysis

Tolerance = 10.0 PPM / DBE: min = -1.5, max = 50.0

Selected filters: None

Monoisotopic Mass, Even Electron Ions

15 20 formulas (e) evaluated with 1 result within limits (up to 50 best isotopic matches for each mass)

Elements Used:

C: 0-10 H: 0-50 O: 4-8 P: 1-3

20 Minimum:

-1.5

Maximum:

5.0

10.0

50.0

Mass

Calc. Mass

mDa

PPM

DBE

i-FIT

Formula

190.9874

190.9874

0.0

0.0

-0.5

0.7

C2 H9

O6 P2

25

Supplementary Figure 2: Mass Spectrometry Spectrum (GCMS-ESI) of EDP. (Top) EDP precipitate was weighted and prepared in deionised water at 1 mg mL<sup>-1</sup>. This solution was then analysed using gas chromatography-mass spectrometry for purity and elemental analysis via

---

electrospray ionization tandem mass spectrometry (ESI-MS/MS), ESI-MS/MS:  $m/z$  190 amu  $[M^+]$ . **(Inset)** Data  $^{31}\text{P}\{-^1\text{H}\}$  NMR (162 MHz,  $\text{D}_2\text{O}$ ):  $\delta$  28.04 (s,  $\text{P}=\text{O}$ ). Melting Point:  $210^\circ\text{C}$  -  $215^\circ\text{C}$ . **(Bottom)** Elemental composition for EDP also was analysed using MALDI-TOF Mass Spectrometry for accurate identification of the elements present.
